# Supplementary material for: Increased T cell trafficking as adjunct therapy for HIV-1
Source: PubMed Central journal article supplement (PMC5864072; doi:10.1371/journal.pcbi.1006028), 2018-03-02
Supplement: pcbi.1006028.s009.pdf [file pcbi.1006028.s009.pdf]

**S1 Table 1. Parameters for model 1.**

| Parameter  | Description                                                                                                                              | Value used                                                                     | Reference                                                                                                                                                                              |
|------------|------------------------------------------------------------------------------------------------------------------------------------------|--------------------------------------------------------------------------------|----------------------------------------------------------------------------------------------------------------------------------------------------------------------------------------|
| $\alpha$   | Per cell clearance rate of susceptible cells ( $\text{day}^{-1}$ )                                                                       | 0.01                                                                           | S15 and S16 references.                                                                                                                                                                |
| $\delta_i$ | Per cell clearance rate of infected cells in compartment $i$ ( $\text{day}^{-1}$ )                                                       | $\delta_1 = 1$<br>$\delta_0 = 0.5$ (Fig 5a, 5b)<br>$\delta_0 = 1$ (Fig 5c, 5d) | S17 reference.<br>Different values were used to explore the impact of immune therapy that can reverse impaired cell clearance rates in the drug sanctuaries.                           |
| $u_i$      | The fraction of the body in compartment $i$                                                                                              | $u_0 = 3.69 \times 10^{-5}$<br>$u_1 = 1 - u_0$                                 | S2 reference.                                                                                                                                                                          |
| $z_i$      | Effectiveness in compartment $i$ of the antiretroviral therapy in preventing the infection of cells.                                     | $z_0 = 0.6$<br>$z_1 = 0.97$                                                    | Assumed to represent drug sanctuaries<br>To model a main compartment where drugs penetrate effectively.                                                                                |
| $\beta$    | Transmission coefficient ( $\text{day}^{-1}$ )                                                                                           | $4.3 \times 10^{-10}$                                                          | Estimated to fix the basic reproductive number ( $R_0=6$ ) (S18 reference).                                                                                                            |
| $\lambda$  | Birth rate of uninfected cells ( $\text{day}^{-1}$ )                                                                                     | $1.4 \times 10^8$                                                              | Estimated by fitting the model to infected cell data prior to ART (S3 reference).                                                                                                      |
| $\kappa$   | Factor increase in the trafficking rate caused by trafficking therapy                                                                    | 1 (Fig 4c)<br>3.5 (Fig 4b, 4d)<br>5 (Fig 4a)                                   | These values were chosen to demonstrate the different impact upon viral dynamics of the addition of a trafficking therapy                                                              |
| $\tau_i$   | Per cell rate of traffic of cells from compartment $i$ to the other compartment in the absence trafficking therapy ( $\text{day}^{-1}$ ) | $\tau_0 = 0.5$<br>$\tau_1 = \tau_0 u_0 / u_1$                                  | $\tau_0$ is assumed to be one half the clearance rate of infected cells ( $\delta$ ) in the absence of a trafficking therapy<br>$\tau_1$ is scaled to account for the compartment size |

## References

S2. Lorenzo-Redondo R, Fryer HR, Bedford T, Kim EY, Archer J, Kosakovsky Pond SL, et al. Persistent HIV-1 replication maintains the tissue reservoir during therapy. *Nature*. 2016;530(7588):51-6.

S3. Fletcher CV, Staskus K, Wietgreffe SW, Rothenberger M, Reilly C, Chipman JG, et al. Persistent HIV-1 replication is associated with lower antiretroviral drug concentrations in lymphatic tissues. *Proc Natl Acad Sci U S A*. 2014;111(6):2307-12.

S15. De Boer RJ, Perelson AS. Quantifying T lymphocyte turnover. *Journal of theoretical biology*. 2013;327:45-87.

S16. Stafford MA, Corey L, Cao Y, Daar ES, Ho DD, Perelson AS. Modeling plasma virus concentration during primary HIV infection. *Journal of theoretical biology*. 2000;203(3):285-301.

S17. Markowitz M, Louie M, Hurley A, Sun E, Di Mascio M, Perelson AS, et al. A novel antiviral intervention results in more accurate assessment of human immunodeficiency virus type 1 replication dynamics and T-cell decay in vivo. *Journal of virology*. 2003;77(8):5037-8.

S18. Ribeiro RM, Qin L, Chavez LL, Li D, Self SG, Perelson AS. Estimation of the initial viral growth rate and basic reproductive number during acute HIV-1 infection. *Journal of virology*. 2010;84(12):6096-102.
